# Supplementary material
Source: publisher site journal article supplement (https://www.dovepress.com/article/211834)
Supplement: Supplementary file 1 [file get_supplementary_file.php]

Appendix 1. Robins-I assessment of bias for the included studies

|  | Confounding | Selection | Classification | Intended intervention | Missing data | Outcomes | Report | Total |
| --- | --- | --- | --- | --- | --- | --- | --- | --- |
| Ameli23 | Critical favours experimental | Critical favours experimental | Low unpredictable | Serious favours experimental | Serious favours experimental | Moderate favours experimental | Serious favours experimental | Critical favours experimental |
| Amendola17 | Serious favours experimental | Serious favours experimental | Low unpredictable | Serious favours experimental | Moderate favours experimental | Moderate favours experimental | Serious favours experimental | Serious favours experimental |
| Boriani24 | Serious favours experimental | Critical favours experimental | Low unpredictable | Serious favours experimental | Moderate favours experimental | Moderate favours experimental | Serious favours experimental | Critical favours experimental |
| Capanna25 | Critical favours experimental | Critical favours experimental | Low unpredictable | Serious favours experimental | Serious favours experimental | Moderate favours experimental | Serious favours experimental | Critical favours experimental |
| Chao26 | Critical favours experimental | Critical favours experimental | Low unpredictable | Serious favours experimental | Moderate favours experimental | Moderate favours experimental | Serious favours experimental | Critical favours experimental |
| Daszkiewicz14 | Critical favours experimental | Critical favours experimental | Moderate favours experimental | Serious favours experimental | Serious favours experimental | Serious favours experimental | Critical favours experimental | Critical favours experimental |
| De Kleuver9 | Critical favours experimental | Critical favours experimental | Low unpredictable | Serious favours experimental | Moderate favours experimental | Moderate favours experimental | Serious favours experimental | Critical favours experimental |
| Feigenburg15 | Serious favours experimental | Critical favours experimental | Low unpredictable | Serious favours experimental | Moderate favours experimental | Serious favours experimental | Serious favours experimental | Critical favours experimental |
| Garg2 | Serious favours experimental | Serious favours experimental | Low unpredictable | Serious favours experimental | Moderate favours experimental | Moderate favours experimental | Moderate favours experimental | Serious favours experimental |
| Geffroy27 | Critical favours experimental | Critical favours experimental | Low unpredictable | Serious favours experimental | Moderate favours experimental | Moderate favours experimental | Serious favours experimental | Critical favours experimental |
| Kieser8 | Serious favours experimental | Serious favours experimental | Low unpredictable | Low favours experimental | Moderate favours experimental | Low favours experimental | Moderate favours experimental | Serious favours experimental |
| Mesfin7 | Critical favours experimental | Critical favours experimental | Moderate favours experimental | Serious favours experimental | Serious favours experimental | Serious favours experimental | Serious favours experimental | Critical favours experimental |
| Novais28 | Critical favours experimental | Critical favours experimental | Low unpredictable | Serious favours experimental | Serious favours experimental | Serious favours experimental | Serious favours experimental | Critical favours experimental |
| Ozaki29 | Critical favours experimental | Critical favours experimental | Moderate favours experimental | Serious favours experimental | Serious favours experimental | Serious favours experimental | Serious favours experimental | Critical favours experimental |
| Papagelopoulos30 | Critical favours experimental | Critical favours experimental | Serious favours experimental | Critical favours experimental | Critical favours experimental | Critical favours experimental | Critical favours experimental | Critical favours experimental |
| Rossi1 | Critical favours experimental | Critical favours experimental | Moderate favours experimental | Serious favours experimental | Serious favours experimental | Serious favours experimental | Serious favours experimental | Critical favours experimental |
| Sebaaly13 | Critical favours experimental | Critical favours experimental | Low unpredictable | Critical favours experimental | Moderate favours experimental | Moderate favours experimental | Critical favours experimental | Critical favours experimental |
| Shiels12 | Critical favours experimental | Critical favours experimental | Low unpredictable | Serious favours experimental | Moderate favours experimental | Moderate favours experimental | Serious favours experimental | Critical favours experimental |
| Terzi3 | Serious favours experimental | Serious favours experimental | Low unpredictable | Serious favours experimental | Moderate favours experimental | Moderate favours experimental | Serious favours experimental | Serious favours experimental |
| Zenenos11 | Critical favours experimental | Critical favours experimental | Low unpredictable | Critical favours experimental | Moderate favours experimental | Moderate favours experimental | Serious favours experimental | Critical favours experimental |
| Zileli6 | Critical favours experimental | Critical favours experimental | Moderate favours experimental | Serious favours experimental | Moderate favours experimental | Moderate favours experimental | Serious favours experimental | Critical favours experimental |
